# Supplementary material
Source: PubMed Central journal article supplement (PMC7132251)
Supplement: pnas.1911868117.sapp.pdf [file pnas.1911868117.sapp.pdf]

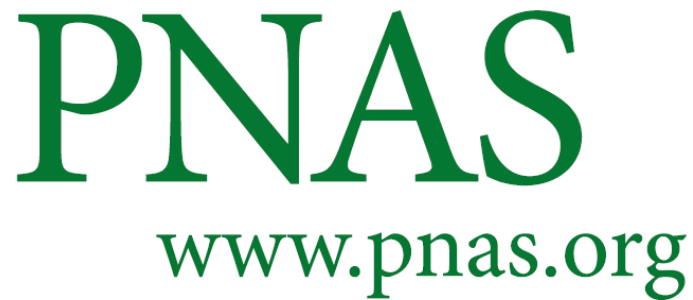

Supplementary Information for

**Sitting, squatting, and the evolutionary biology of human inactivity**

David A. Raichlen<sup>1</sup>, Herman Pontzer<sup>2,3</sup>, Theodore W. Zderic<sup>4</sup>, Jacob A. Harris<sup>5</sup>, Audax Z.P. Mabulla<sup>6</sup>, Marc T. Hamilton<sup>4,7</sup>, Brian M. Wood<sup>5,8</sup>

<sup>1</sup> Human and Evolutionary Biology Section, Department of Biological Sciences, University of Southern California, Los Angeles, California

<sup>2</sup> Department of Evolutionary Anthropology, Duke University, Durham, North Carolina

<sup>3</sup> Duke Global Health Institute, Duke University, Durham, North Carolina

<sup>4</sup> Department of Health and Human Performance, University of Houston, Houston Texas

<sup>5</sup> Department of Anthropology, University of California Los Angeles, Los Angeles, California

<sup>6</sup> Department of Archaeology, University of Dar es Salaam, Dar es Salaam, Tanzania

<sup>7</sup> Department of Biology and Biochemistry, University of Houston, Houston Texas

<sup>8</sup> Department of Human Behavior, Ecology and Culture, Max Plank Institute for Evolutionary Anthropology.

**Correspondence:**

David Raichlen

Email: david.raichlen@usc.edu

**This PDF file includes:**

Tables S1 to S4

Supplementary Tables

Table S1. CVD biomarker data for Hadza participants

| ID   | Sex | Age | Total Chol [mg/dl] | HDL [mg/dl] | LDL [mg/dl] | LDL-Friedewald equation [mg/dl] | Triglycerides [mg/dl] | Glucose [mg/dl] | Device-Glucose | Actigraphy Sample |
|------|-----|-----|--------------------|-------------|-------------|---------------------------------|-----------------------|-----------------|----------------|-------------------|
| HZ13 | F   | 49  | 118                | 42          | 60          | 61                              | 74                    | 73              | CardioChek     | 1                 |
| HZ32 | F   | 24  | 117                | 39          | 53          | 53                              | 125                   | 56              | CardioChek     | 1                 |
| HZ33 | F   | 51  | 149                | 59          | 76          | 77                              | 64                    | 60              | CardioChek     | 1                 |
| HZ60 | F   | 50  | 140                | 41          | 86          | 85                              | 69                    | 69              | CardioChek     | 1                 |
| HZ61 | F   | 61  | 123                | 51          |             | 62                              | <50                   | 71              | CardioChek     | 1                 |
| HZ62 | F   | 20  | 165                | 41          | 113         | 113                             | 55                    | 83              | CardioChek     | 1                 |
| HZ63 | F   | 19  | 107                | 36          | 54          | 55                              | 81                    | 74              | CardioChek     | 1                 |
| HZ68 | F   | 46  | 105                | 46          | 35          | 35                              | 122                   | 92              | OneTouch       | 0                 |
| HZ69 | F   | 15  | 107                | 40          | 44          | 44                              | 114                   | 89              | OneTouch       | 0                 |
| HZ70 | F   | 66  | 128                | 42          | 60          | 60                              | 129                   | 93              | OneTouch       | 0                 |
| HZ71 | F   | 16  | <100               | 34          |             | 48                              | 85                    | 90              | OneTouch       | 0                 |
| HZ72 | F   | 18  | <100               | 43          |             | 32                              | 121                   | 98              | OneTouch       | 0                 |
| HZ73 | F   | 23  | <100               | 40          |             | 42                              | 86                    | 74              | OneTouch       | 0                 |
| HZ74 | F   | 37  | <100               | 43          |             | 40                              | 81                    | 110             | OneTouch       | 0                 |
| HZ75 | F   | 28  | <100               | 28          |             | 46                              | 125                   | 93              | OneTouch       | 0                 |
| HZ76 | F   | 14  |                    |             |             |                                 |                       | 90              | OneTouch       | 0                 |
| HZ77 | F   | 44  |                    |             |             |                                 |                       | 100             | OneTouch       | 0                 |
| HZ29 | M   | 56  | 100                | 27          |             | 63                              | <50                   | 59              | CardioChek     | 1                 |
| HZ45 | M   | 25  | <100               | 30          |             | 59                              | <50                   | 73              | CardioChek     | 0                 |
| HZ50 | M   | 24  | <100               | 32          |             | 52                              | 75                    | 65              | CardioChek     | 1                 |
| HZ52 | M   | 32  | <100               | 33          |             | 48                              | 90                    | 136             | CardioChek     | 0                 |
| HZ53 | M   | 47  | <100               | 38          |             | 41                              | 102                   | 58              | CardioChek     | 1                 |
| HZ54 | M   | 24  | <100               | <15         |             | 57                              | 141                   | 75              | CardioChek     | 0                 |

|      |   |    |      |     |     |     |     |     |            |   |
|------|---|----|------|-----|-----|-----|-----|-----|------------|---|
| HZ55 | M | 46 | 172  | 34  | 115 | 114 | 122 | 79  | CardioChek | 0 |
| HZ56 | M | 29 | <100 | 16  |     | 59  | 118 | 68  | CardioChek | 1 |
| HZ57 | M | 56 | <100 | 34  |     | 40  | 125 | 69  | CardioChek | 1 |
| HZ58 | M | 20 | 115  | 33  | 71  | 68  | 68  | 59  | CardioChek | 0 |
| HZ59 | M | 31 | 111  | 38  | 61  | 61  | 60  | 56  | CardioChek | 1 |
| HZ64 | M | 24 | 107  | 34  | 60  | 61  | 62  | 51  | CardioChek | 1 |
| HZ65 | M | 18 | 125  | 31  | 78  | 77  | 85  | 74  | CardioChek | 1 |
| HZ66 | M | 78 | <100 | 22  |     | 66  | 57  | 133 | CardioChek | 0 |
| HZ67 | M | 36 | <100 | 33  |     | 56  | <50 | 62  | CardioChek | 1 |
| HZ78 | M | 45 | 103  | 45  |     | 48  | <50 | 97  | OneTouch   | 0 |
| HZ79 | M | 65 | 108  | <20 |     | 79  | <50 | 82  | OneTouch   | 0 |
| HZ80 | M | 67 | 123  | 48  |     | 65  | 50  | 131 | OneTouch   | 0 |
| HZ81 | M | 56 | 126  | 63  |     | 53  | <50 | 90  | OneTouch   | 0 |
| HZ82 | M | 44 | <100 | <20 |     | 70  | <50 | 98  | OneTouch   | 0 |
| HZ83 | M | 19 | <100 |     |     | 72  | 42  | 84  | OneTouch   | 0 |
| HZ86 | M | 43 | <100 | 46  |     | 36  | 87  | 93  | OneTouch   | 0 |
| HZ87 | M | 38 | <100 | 46  |     | 43  | <50 | 94  | OneTouch   | 0 |
| HZ88 | M | 42 |      |     |     |     |     | 85  | OneTouch   | 0 |
| HZ89 | M | 56 |      |     |     |     |     | 103 | OneTouch   | 0 |
| HZ90 | M | 34 |      |     |     |     |     | 73  | OneTouch   | 0 |
| HZ91 | M | 61 |      |     |     |     |     | 98  | OneTouch   | 0 |
| HZ92 | M | 21 |      |     |     |     |     | 84  | OneTouch   | 0 |
| HZ93 | M | 24 |      |     |     |     |     | 81  | OneTouch   | 0 |
| HZ78 | M | 28 |      |     |     |     |     | 85  | OneTouch   | 0 |
| HZ79 | M | 21 |      |     |     |     |     | 74  | OneTouch   | 0 |

Note that the CardioChek does not calculate values of total cholesterol below 100 mg/dl, triglycerides below 50 mg/dl, or HDL below 20 mg/dl. In cases where these values fell below the threshold for measurement, the next lowest value was imputed (e.g, total

cholesterol of <100 was imputed as 99; HDL <20 was imputed as 19) for calculation of group means. Actigraphy sample refer to whether individuals were also participants in the actigraphy study (1=yes, 0=no).

Table S2. Summary data based on waking times from Samson et al. (55)

| Variable                    | Female   |       | Male     |       |
|-----------------------------|----------|-------|----------|-------|
|                             | mean     | SD    | mean     | SD    |
| Age                         | 36.50    | 15.36 | 38.94    | 13.13 |
| Sedentary time (hrs/day)    | 10.25    | 1.86  | 10.02    | 2.24  |
| Standing time (hrs/day)     | 2.20     | 0.78  | 1.83     | 1.04  |
| Average sed. bout (minutes) | 15.40    | 7.22  | 16.50    | 11.53 |
| Transitions (per day)       | 48.01    | 11.31 | 48.67    | 17.04 |
| MVPA (minutes/day)          | 75.17    | 75.44 | 102.29   | 77.14 |
| MVPA bouts (minutes/day)    | 49.28    | 73.70 | 76.59    | 73.92 |
| Sleep onset                 | 22:00:00 |       | 22:00:00 |       |
| Sleep end                   | 7:00:00  |       | 7:00:00  |       |

Table S3. Summary data based on waking times from Yetish et al. (54)

| Variable                    | Female   |       | Male     |       |
|-----------------------------|----------|-------|----------|-------|
|                             | mean     | SD    | mean     | SD    |
| Age                         | 36.50    | 15.36 | 38.94    | 13.13 |
| Sedentary time (hrs/day)    | 11.47    | 1.85  | 11.26    | 2.27  |
| Standing time (hrs/day)     | 2.26     | 0.79  | 1.87     | 1.05  |
| Average sed. bout (minutes) | 15.93    | 6.32  | 17.47    | 12.33 |
| Transitions (per day)       | 51.40    | 11.78 | 51.55    | 17.30 |
| MVPA (minutes/day)          | 75.70    | 75.28 | 103.07   | 77.53 |
| MVPA bouts (minutes/day)    | 49.28    | 73.70 | 77.19    | 74.23 |
| Sleep onset                 | 22:00:00 |       | 22:00:00 |       |
| Sleep end                   | 5:40:00  |       | 5:40:00  |       |

Table S4. Pair-wise comparisons of postures used by Hadza adults

|            | sit      | kneel   | lie down | squat   |
|------------|----------|---------|----------|---------|
| kneel      | 2.90E-14 | -       | -        | -       |
| lie down   | 1.10E-15 | 0.6251  | -        | -       |
| squat      | < 2e-16  | 0.0017  | 0.0073   | -       |
| ground sit | < 2e-16  | < 2e-16 | < 2e-16  | < 2e-16 |
